# Supplementary material for: GPT-4 versus human authors in clinically complex MCQ creation: a blinded analysis of item quality
Source: Research Square preprint supplement (doi:10.21203/rs.3.rs-4831476/v1), 2024-08-21
Supplement: Supplementary file 1 [file 7637e92efd533b545ce14ffe.docx]

**Appendix 1. Excerpt of test blueprint including key learning points**

|  |  | **Human (novice)** | | **Human (expert)** | | **AI** | | |
| --- | --- | --- | --- | --- | --- | --- | --- | --- |
| **Discipline** | **Specialty** | **Topic** | **Focus** | **Topic** | **Focus** | **Topic** | **Focus** | **Key learning point** |
| Medicine | Dermatology | Lichen sclerosus | D | Erythema multiforme | D | Melanoma | M | Cases of suspected melanoma where appropriate should undergo excision biopsy with a 2 mm margin of clearance. |
| Population health | GP | Fatigue workup | I | Fatigue | M | Back pain | I | Presentations of back pain in the absence of red flags does not typically require imaging investigation. |
| Child health | Paediatrics | Epstein Barr Virus infection | D | ALL | D | ITP | D | Idiopathic thrombocytopenic purpura (ITP) is diagnosed when alternative causes of thrombocytopenia have been excluded |
| Population health | GP | Diabetes | M | BPPV | M | Sinusitis | M | Most cases of sinusitis should be managed without antibiotics unless red flags are present. |
| Surgery | General Surgery | Dupuytren's | D | Appendicitis | M | Bowel cancer | M | Total neoadjuvant therapy is now the treatment of choice for a locally advanced rectal cancer |

*Key: GP = General practice, D=Diagnosis, I=Investigation, M=Management*

**Appendix 2. GPT-4 output variability scoring at temperature 0.0**

| **Topic** | **Output No.** | **Content validity** | **Within scope** | **Item anatomy** | **Item writing flaws** | **Cognitive skill level** | **Global impression** | **Mean (sd)** |
| --- | --- | --- | --- | --- | --- | --- | --- | --- |
| Vaginal bleeding | 1 | 4 | 4 | 4 | 1 | 2 | **3** | **3 (0)** |
|  | 2 | 4 | 4 | 4 | 1 | 2 | **3** |  |
|  | 3 | 4 | 4 | 4 | 1 | 2 | **3** |  |
| Asthma | 1 | 4 | 4 | 4 | 0 | 3 | **4** | **4 (0)** |
|  | 2 | 4 | 4 | 4 | 0 | 3 | **4** |  |
|  | 3 | 4 | 4 | 4 | 0 | 3 | **4** |  |
| Ascending cholangitis | 1 | 3 | 4 | 4 | 0 | 2 | **3** | **3.33 (0.586)** |
|  | 2 | 4 | 4 | 4 | 1 | 2 | **4** |  |
|  | 3 | 3 | 4 | 4 | 0 | 2 | **3** |  |
| Pneumothorax | 1 | 4 | 4 | 4 | 0 | 2 | **4** | **4 (0)** |
|  | 2 | 4 | 4 | 4 | 0 | 2 | **4** |  |
|  | 3 | 4 | 4 | 4 | 0 | 2 | **4** |  |
| Myocardial infarction | 1 | 3 | 4 | 4 | 0 | 2 | **3** | **3 (0)** |
|  | 2 | 3 | 4 | 4 | 0 | 2 | **3** |  |
|  | 3 | 3 | 4 | 4 | 0 | 2 | **3** |  |
| Hypertension | 1 | 4 | 4 | 4 | 0 | 2 | **4** | **4 (0)** |
|  | 2 | 4 | 4 | 4 | 0 | 3 | **4** |  |
|  | 3 | 4 | 4 | 4 | 0 | 2 | **4** |  |

**Appendix 3. Examples of MCQs generated by a novice, expert, and AI**

| **Author of item** | **Question, Answer, and Explanatory Feedback** |
| --- | --- |
| **Novice** | A 65-year-old retired ship maker presented with dyspnoea on exertion and a non-productive cough over the past 1 year which has been gradually worsening. On further history, he mentions that he feels more tired recently, however, there is no loss of weight or fever. He is a chronic smoker (30-pack year smoking history), and drinks 2 cans of beer daily. His father passed away at the age of 77 due to colon cancer.  A physical examination is performed which revealed an elderly man who appears generally well and comfortable in the seated position without any respiratory distress. A full respiratory examination reveals fine bibasal crepitations. A plain chest X-ray revealed linear reticular opacities in both lower lobes of the lungs, and pulmonary function tests revealed a reduced lung capacity and DLCO.  **Which one of the following is the most likely diagnosis?**  Choose the single best answer.   1. **Asbestosis*** 2. Chronic obstructive pulmonary disease 3. Silicosis 4. Coal workers' pneumoconiosis 5. Lung cancer     **Feedback**  **Asbestosis** is a type of pneumoconiosis that is commonly seen in workers with exposure to asbestos, particularly shipbuilders, plumbers, welders, construction workers, and textile workers. Secondhand exposure to asbestos may also occur among family members of exposed workers. In patients with asbestosis, the clinical presentation is usually asymptomatic, however, patients may present with progressive dyspnoea, non-productive cough, and fatigue. Advanced asbestosis may lead to finger clubbing, dry bibasal crepitations and right ventricular failure.  The diagnosis of asbestosis is based on a significant history of exposure of asbestos, chest X-ray or CT assessment, and bronchoalveolar lavage. A chest X-ray or CT scan would reveal linear reticular opacities in bilateral lower lobes of the lungs which signifies fibrosis. Bronchoalveolar lavage can be done when non-invasive measures fail to provide a conclusive diagnosis, where the presence of asbestos bodies under the use of Prussian Blue stain from an alveolar sputum sample can confirm the diagnosis. A pulmonary function test can also be performed which may show a decreased lung volume and a decreased DLCO, however is non-specific and is only used to monitor the progression in lung function.  Chronic obstructive pulmonary disease (COPD) is an umbrella term for a range of progressive lung disease, which includes chronic bronchitis and emphysema, and is most commonly associated with a history of smoking, which should be considered in this patient. However, the cough in COPD is usually productive in nature, and with the history of asbestos exposure this option is less likely.  Silicosis is a type of pneumoconiosis associated with the inhalation of silica dust, and is commonly seen in workers in industries such as sandblasting, quarrying, mining, and foundry. The features of silicosis are similar to asbestosis in the early stage and should be considered in this patient, however a through past history should be taken to ascertain the occupational risk factors of different type of pneumoconiosis.  Coal workers' pneumoconiosis is a type of pneumoconiosis that is associated with prolonged coal dust exposure, commonly seen in coal miners. Simple coal workers' pneumoconiosis can present similarly to the patient in the stem, while complicated cases may present with respiratory failure and pulmonary hypertension.  Lung cancer should be considered in this patient, as the patient has a family history of malignancy, as well as a significant smoking history. However due to the lack of constitutional symptoms of malignancies such as weight loss, loss of appetite, fever, and specific symptoms pointing towards lung cancer such as haemoptysis, the diagnosis of lung cancer is less likely. |
| **Expert** | A 27-year-old Indigenous woman presents to her GP with progressively increasing severe itch. It is worse at night on her hands and feet and has lasted for the past six days. She lives with her family who have also started complaining of itching on their hands and feet. Her medical history is unremarkable.  On examination, there are multiple non-tender, bilateral, erythematous papules and excoriations on her hands and feet, more prominent in the interdigital webbed spaces. Numerous scratch marks are also visible.  **Which one of the following is the most appropriate treatment?**  Choose the single best answer.   1. Mupirocin 2. Betamethasone 3. Clotrimazole 4. **Permethrin*** 5. Benzyl benzoate     **Feedback**  The condition responsible for this patient's symptoms is most likely scabies, which is a transmissible skin disease caused by the ectoparasitic mite Sarcoptes scabiei. The symptoms include severe itching, which is worse at night, in characteristic locations such as hands, feet, genitalia, breast crease, etc. Due to its transmissible nature, it can spread very quickly to the family of the patient and they usually also present with the symptoms of severe itching, The examination findings of scabies include erythematous, bilateral papules, excoriations, and linear scratch marks. **Topical permethrin,** as a 5% creamis the first-line treatment option for patients with scabies which should be applied to the whole body (excluding the head and neck in patients other than infants) and washed off after eight hours. It is one of the safest antiscabetic topical treatment options.  **Topical mupirocin,** an antibiotic Is used for treating bacterial infections such as impetigo which can present with itching but usually there would be tender lesions and fluid-filled vesicles with/without crusting.  **Topical betamethasone**, which is a corticosteroid might be used as an adjunctive treatment option to relieve the inflammation causing the itching, but it is not the most appropriate first-line treatment option.  **Topical clotrimazole,** an antifungal is used in the treatment of fungal infections such as different variants of tinea, they can present with itching but it is usually limited to the patients, is usually asymmetrical and the characteristic lesions usually consist of a raised border and clearing in the middle (ringworm).  **Topical benzyl benzoate** is also a treatment option for scabies, but it is usually considered a second-line treatment option because it can result in skin irritation. |
| **AI (GPT-4)** | A 25-year-old woman presents to a clinic while travelling in Southeast Asia. She reports a 2-day history of frequent watery diarrhoea, abdominal cramps, and nausea. She denies any fever, bloody stools, or vomiting. She has been trying to maintain her hydration by drinking bottled water but is finding it difficult to keep up with the fluid loss. She has no significant past medical history and takes no regular medications.  **What is the most appropriate initial management for this patient?**  Choose the single best answer.   1. Antibiotic therapy 2. Anti-motility agents 3. **Oral rehydration solution*** 4. Intravenous fluids 5. Probiotics     **Feedback**  The priority in the management of traveller's diarrhoea, especially in the absence of severe features such as bloody stools or high fever, is fluid replacement. This is best achieved with an **oral rehydration solution** which contains the correct balance of salts and glucose to enhance water absorption from the gut. This approach is supported by the World Health Organization and is effective in preventing dehydration from diarrhoeal diseases.  **Antibiotic therapy** may be considered in certain cases, particularly if symptoms are severe, there is a high fever, or bloody diarrhoea, but it is not the first-line treatment for uncomplicated traveller's diarrhoea.  **Anti-motility agents** can reduce the frequency of diarrhoea but do not address fluid loss and can be contraindicated in certain types of infections.  **Intravenous fluids** may be necessary in cases of severe dehydration or if the patient is unable to tolerate oral intake, but this is not indicated in this case.  While **probiotics** may have a role in the prevention and treatment of traveller's diarrhoea, they are not considered a primary treatment modality for acute management and rehydration. |
